# Supplementary material for: Genomic profiles and transcriptomic microenvironments in 2 patients with synchronous lung adenocarcinoma and lung squamous cell carcinoma: a case report
Source: PubMed Central journal article supplement (PMC6995067; doi:10.1186/s12920-020-0663-8), 2020-01-31
Supplement: 12920_2020_663_MOESM1_ESM.pdf [file 12920_2020_663_MOESM1_ESM.pdf]

Type

- C>A
- C>G
- C>T
- T>A
- T>C
- T>G

Percentage of mutations

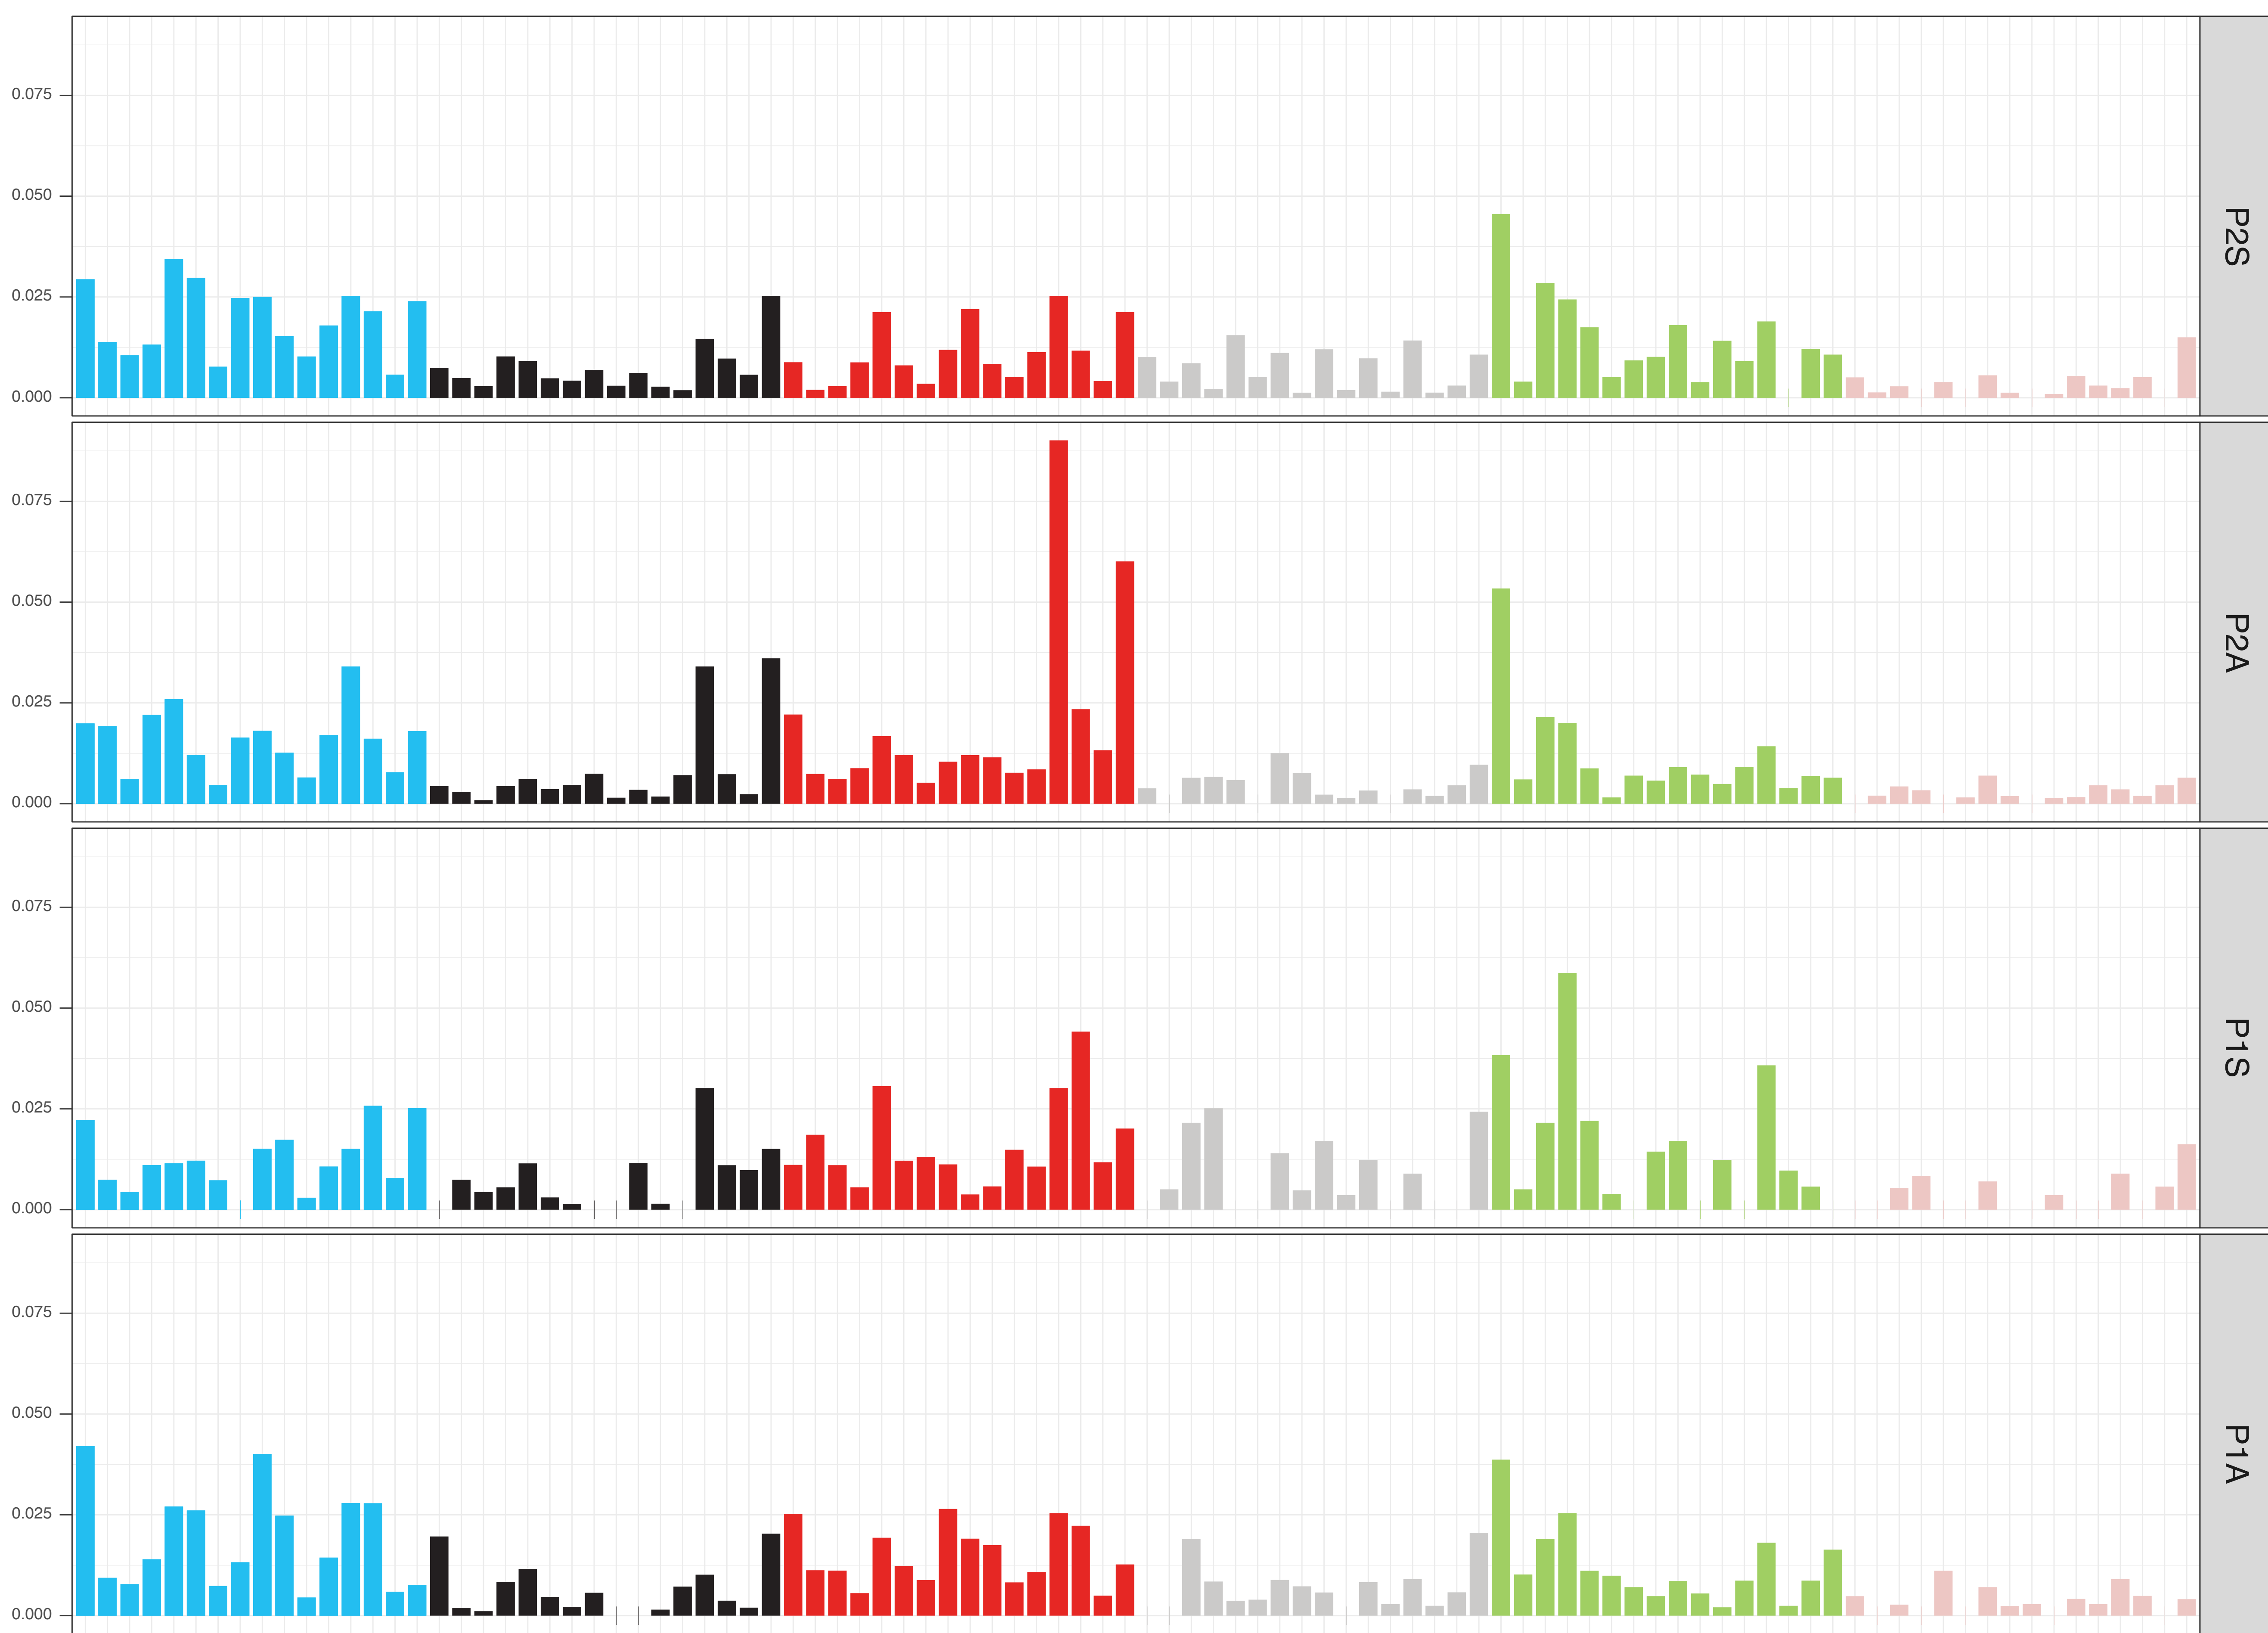

P2S

P2A

P1S

P1A
