# Supplementary material for: Genomic profiles and transcriptomic microenvironments in 2 patients with synchronous lung adenocarcinoma and lung squamous cell carcinoma: a case report
Source: PubMed Central journal article supplement (PMC6995067; doi:10.1186/s12920-020-0663-8), 2020-01-31

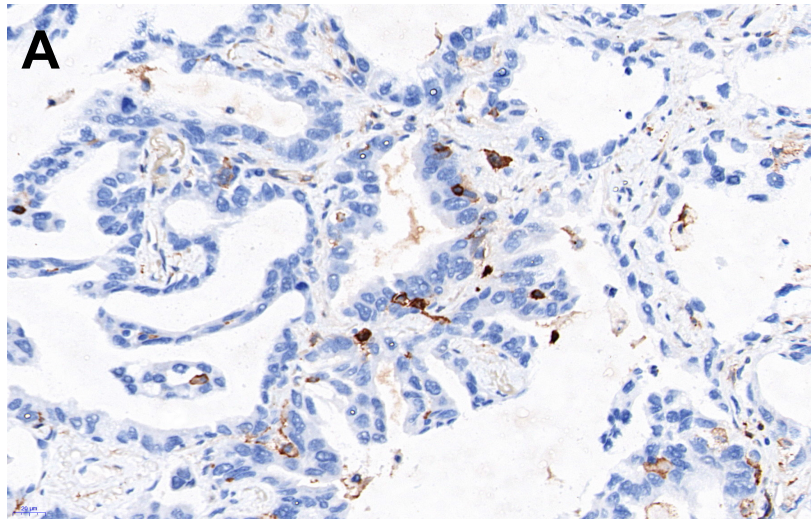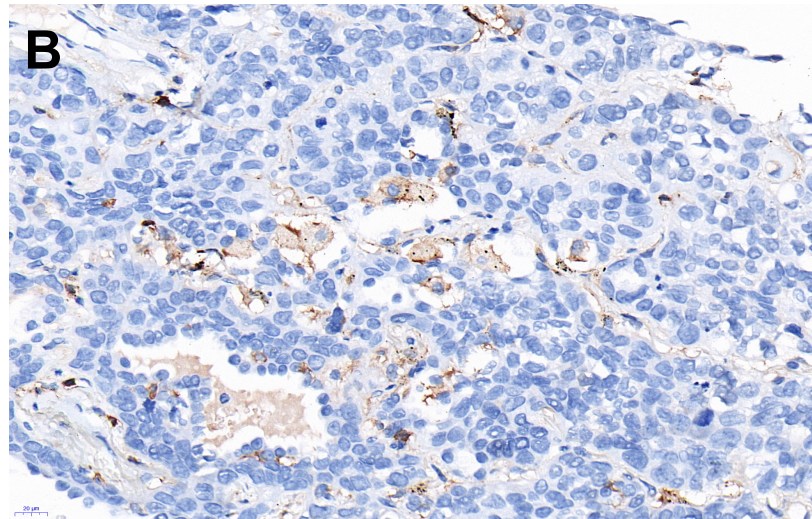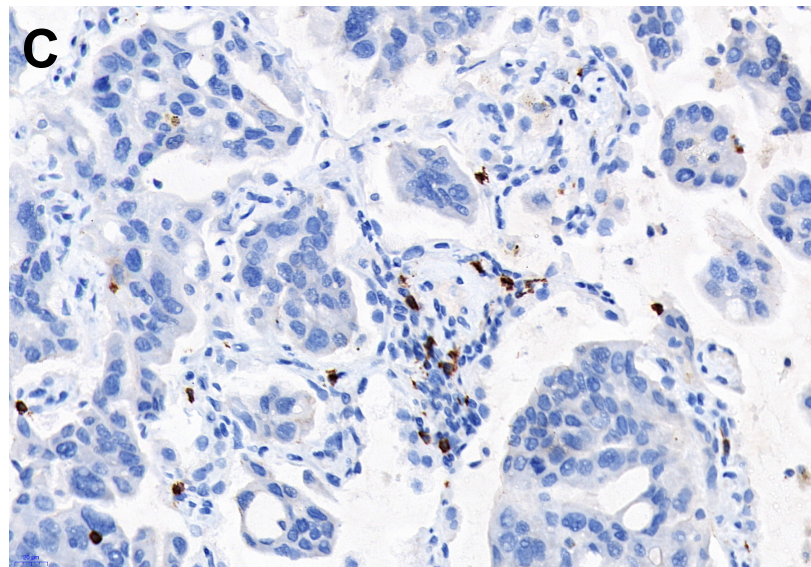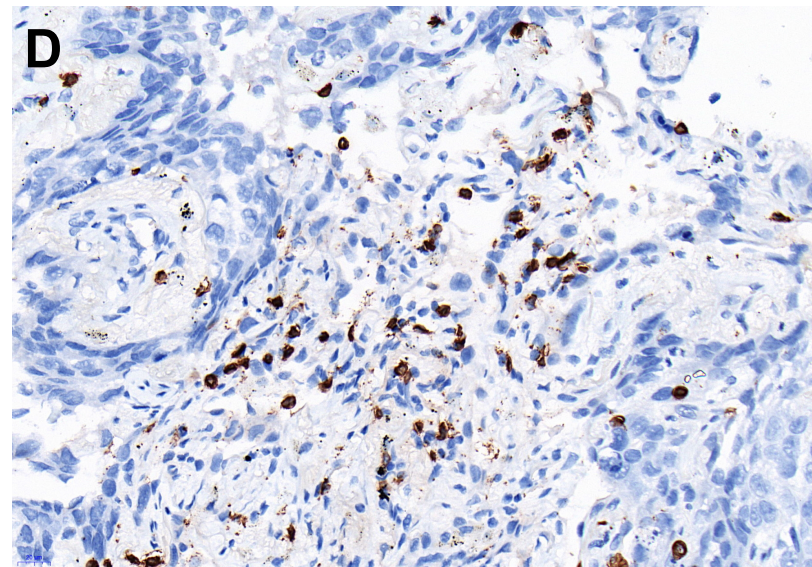

Supplement: 12920_2020_663_MOESM2_ESM.pdf [file 12920_2020_663_MOESM2_ESM.pdf]
